# Supplementary material
Source: PubMed Central journal article supplement (PMC7338866)
Supplement: jaalas2020000347.SD1.pdf [file jaalas2020000347.SD1.pdf]

**Supplemental Table 1.** VHS cut-off values with sensitivity, specificity, and likelihood ratio for RL radiographic view in rhesus macaques with cardiac disease (ACD group)

| RL-VHS | Sensitivity (%) | 95% CI   | Specificity (%) | 95% CI   | Likelihood ratio |
|--------|-----------------|----------|-----------------|----------|------------------|
| >7.55  | 100             | 87%–100% | 0.8             | 0.04%–5% | 1.01             |
| >8     | 100             | 87%–100% | 2.5             | 0.7%–7%  | 1.03             |
| >8.3   | 100             | 87%–100% | 3.4             | 1%–8%    | 1.04             |
| >8.65  | 100             | 87%–100% | 5.9             | 3%–12%   | 1.06             |
| >8.9   | 96              | 81%–100% | 5.9             | 3%–12%   | 1.02             |
| >9.05  | 96              | 81%–100% | 12              | 7%–19%   | 1.09             |
| >9.15  | 92              | 76%–99%  | 14              | 9%–22%   | 1.08             |
| >9.25  | 92              | 76%–99%  | 18              | 13%–26%  | 1.13             |
| >9.35  | 92              | 76%–99%  | 24              | 18%–33%  | 1.22             |
| >9.45  | 92              | 76%–99%  | 29              | 21%–37%  | 1.29             |
| >9.55  | 88              | 71%–96%  | 32              | 24%–41%  | 1.3              |
| >9.65  | 88              | 71%–96%  | 36              | 28%–45%  | 1.39             |
| >9.75  | 77              | 58%–89%  | 44              | 35%–52%  | 1.37             |
| >9.85  | 77              | 58%–89%  | 50              | 41%–58%  | 1.53             |
| >9.95  | 73              | 54%–86%  | 55              | 46%–63%  | 1.61             |
| >10.05 | 65              | 46%–81%  | 61              | 52%–69%  | 1.66             |
| >10.15 | 65              | 46%–81%  | 71              | 63%–79%  | 2.29             |
| >10.25 | 62              | 43%–78%  | 77              | 69%–84%  | 2.71             |
| >10.35 | 46              | 29%–65%  | 81              | 73%–87%  | 2.39             |
| >10.45 | 38              | 22%–57%  | 85              | 77%–90%  | 2.54             |
| >10.55 | 31              | 17%–50%  | 88              | 81%–93%  | 2.62             |
| >10.65 | 27              | 14%–46%  | 92              | 86%–96%  | 3.56             |
| >10.75 | 23              | 11%–42%  | 93              | 87%–97%  | 3.43             |
| >10.85 | 23              | 11%–42%  | 95              | 89%–98%  | 4.58             |
| >10.95 | 19              | 9%–38%   | 95              | 89%–98%  | 3.81             |
| >11.05 | 15              | 6%–34%   | 96              | 91%–98%  | 3.66             |
| >11.20 | 15              | 6%–34%   | 97              | 93%–99%  | 6.1              |
| >11.40 | 8               | 1%–24%   | 99              | 95%–100% | 9.15             |
| >11.55 | 0               | 0%–13%   | 99              | 95%–100% | 0                |

The optimal cut-off value for VHS was determined to be 10.25 (sensitivity, 62%; specificity, 77%) according to the maximal Youden index.

**Supplemental Table 2.** VHS cut-off values with sensitivity, specificity, and likelihood ratio in the VD radiographic view of rhesus macaques with cardiac diseases (ACD group)

| VD-VHS | Sensitivity (%) | 95% CI   | Specificity (%) | 95% CI    | Likelihood ratio |
|--------|-----------------|----------|-----------------|-----------|------------------|
| >8.30  | 100             | 88%–100% | 0.8             | 0.04%–5%  | 1.01             |
| >8.60  | 100             | 88%–100% | 2               | 0.2%–6%   | 1.02             |
| >8.90  | 100             | 88%–100% | 3               | 0.7%–7%   | 1.03             |
| >9.05  | 100             | 88%–100% | 3               | 1%–8%     | 1.04             |
| >9.15  | 100             | 88%–100% | 4               | 2%–9%     | 1.04             |
| >9.25  | 100             | 88%–100% | 5               | 2%–11%    | 1.05             |
| >9.35  | 100             | 88%–100% | 8               | 4%–14%    | 1.08             |
| >9.45  | 97              | 83%–100% | 8               | 4%–14%    | 1.04             |
| >9.55  | 97              | 83%–100% | 8               | 5%–15%    | 1.05             |
| >9.65  | 97              | 83%–100% | 9               | 5%–16%    | 1.06             |
| >9.75  | 93              | 78%–99%  | 11              | 6%–18%    | 1.05             |
| >9.85  | 93              | 78%–99%  | 13              | 8%–20%    | 1.07             |
| >9.95  | 90              | 74%–96%  | 15              | 10%–23%   | 1.06             |
| >10.05 | 83              | 65%–92%  | 21              | 15%–29%   | 1.05             |
| >10.15 | 83              | 65%–92%  | 29              | 21%–37%   | 1.16             |
| >10.25 | 76              | 58%–88%  | 32              | 24%–41%   | 1.12             |
| >10.35 | 76              | 58%–88%  | 42              | 34%–51%   | 1.31             |
| >10.45 | 76              | 58%–88%  | 51              | 42%–60%   | 1.56             |
| >10.55 | 69              | 51%–83%  | 58              | 49%–66%   | 1.64             |
| >10.65 | 66              | 47%–80%  | 63              | 54. %–71% | 1.77             |
| >10.75 | 55              | 38%–72%  | 68              | 59%–76%   | 1.73             |
| >10.85 | 48              | 31%–66%  | 75              | 66%–82%   | 1.92             |
| >10.95 | 45              | 28%–62%  | 78              | 70%–85%   | 2.05             |
| >11.05 | 3               | 20%–53%  | 81              | 73%–87%   | 1.78             |
| >11.15 | 28              | 15%–46%  | 84              | 76%–90%   | 1.73             |
| >11.25 | 28              | 15%–46%  | 88              | 81%–93%   | 2.35             |
| >11.35 | 24              | 12%–42%  | 92              | 86%–96%   | 3.19             |
| >11.45 | 21              | 10%–38%  | 96              | 91%–98%   | 4.92             |
| >11.55 | 21              | 10%–38%  | 97              | 93%–99%   | 8.21             |
| >11.80 | 14              | 5%–31%   | 98              | 94%–100%  | 8.21             |
| >12.10 | 7               | 1%–22%   | 100             | 97%–100%  |                  |
| >12.70 | 3               | 0.2%–17% | 100             | 97%–100%  |                  |

The optimal cut-off value of VHS was determined to be 10.65 (sensitivity, 65.52%; specificity, 63.03%), according to the Youden index.
